# Supplementary material for: A C2N/ZnSe heterostructure with type-II band alignment and excellent photocatalytic water splitting performance
Source: Royal Society of Chemistry journal article supplement (doi:10.1039/d1nj02366g), 2021-01-01
Supplement: d1nj02366g1.pdf [file d1nj02366g1.pdf]

# C<sub>2</sub>N/ZnSe heterostructure with type-II band alignment and excellent photocatalytic water splitting performance

Yifan Rao<sup>‡ a</sup>, Fusheng Zhang<sup>‡ a</sup>, Bao Zhu<sup>c</sup>, Hui Li<sup>a</sup>, Kai Zheng<sup>a</sup>, Yongxian Zou<sup>b</sup>,  
Xiaoxia Feng<sup>b</sup>, Haojie Guo<sup>a</sup>, Jian Qiu<sup>c</sup>, Xianping Chen<sup>a</sup>, Jiabing Yu<sup>\*a</sup>

<sup>a</sup>Key Laboratory of Optoelectronic Technology & Systems, Education Ministry of China, and College of Optoelectronic Engineering, State Key Laboratory of Power Transmission Equipment & System Security and New Technology, Chongqing University, Chongqing 400044, China; [orcid.org/0000-0002-2461-4010](https://orcid.org/0000-0002-2461-4010).

<sup>b</sup>Beijing Special Vehicle Research Institute, Beijing 100072, China.

<sup>c</sup>Faculty of Mechanical and Electrical Engineering, Guilin University of Electronic Technology, Guilin 541004, China.

\* To whom correspondence should be: [yujiab@cqu.edu.cn](mailto:yujiab@cqu.edu.cn)

‡These authors contributed equally to this work.

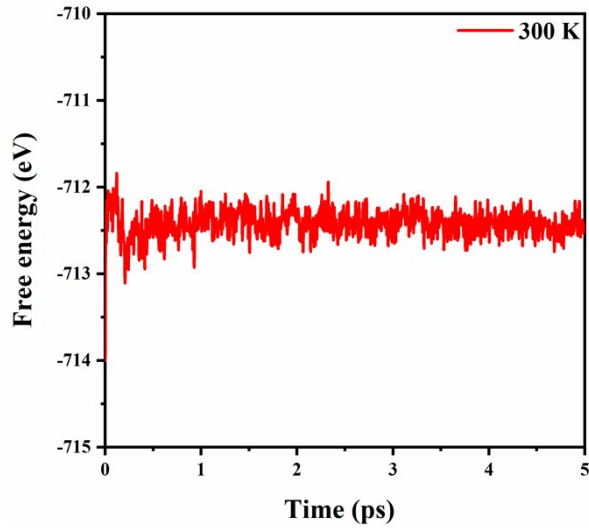

**Fig. S1** (a) AIMD fluctuations of the total energy for  $C_2N/ZnSe$  heterostructure at 300 K with 5ps. (b)

The top and side views of final structures in AIMD simulation.

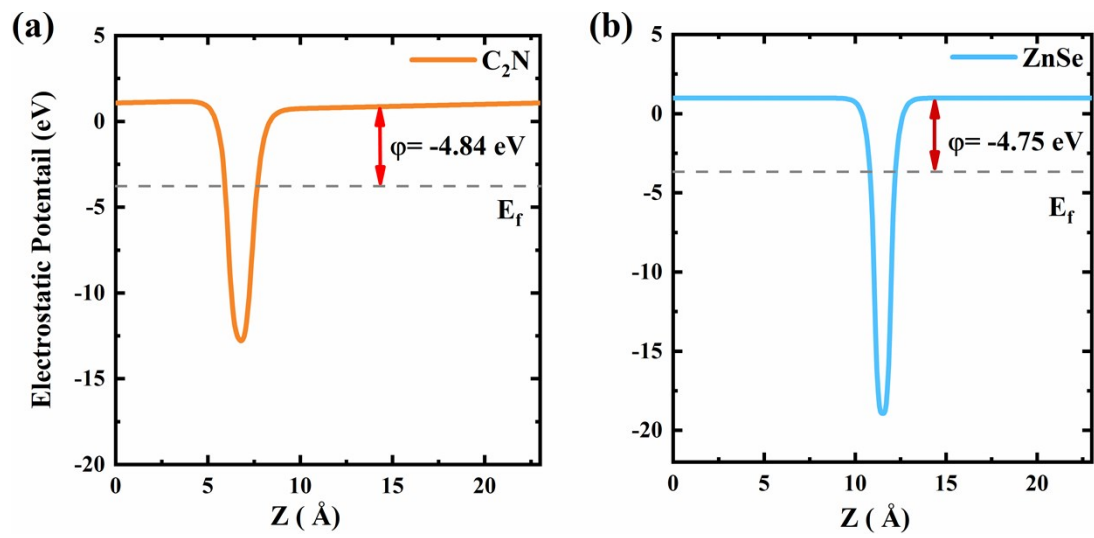

**Fig. S2** Electrostatic potential of  $C_2N$  and ZnSe monolayer.

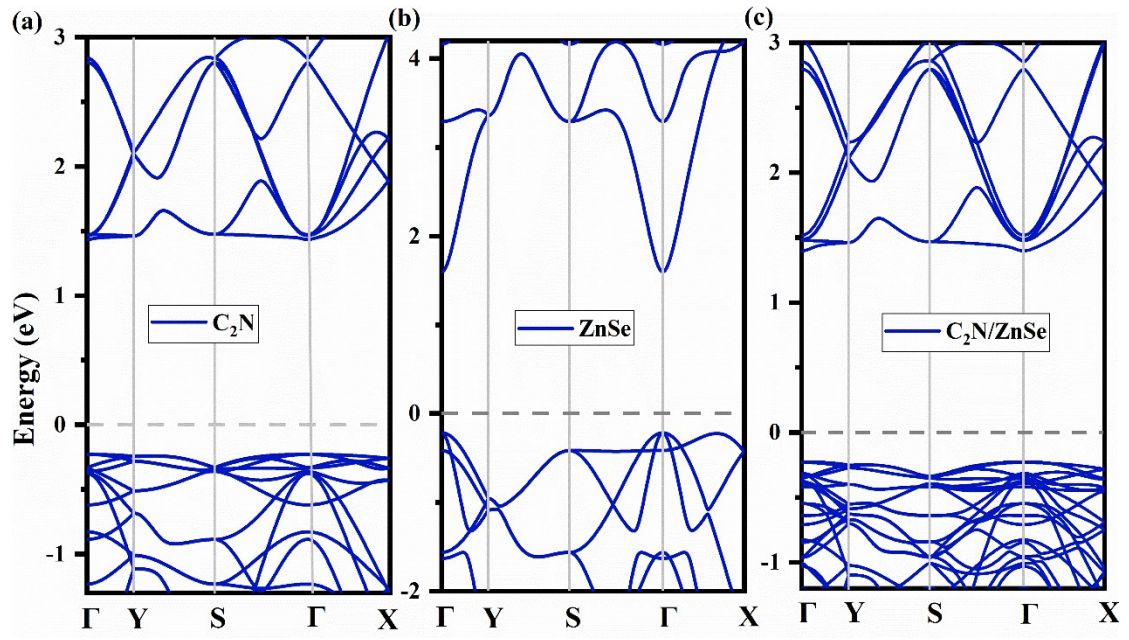

**Fig. S3** Electronic band structures of (a) ZnSe monolayer, (b)  $C_2N$  monolayer and (c)  $C_2N/ZnSe$  heterostructure.

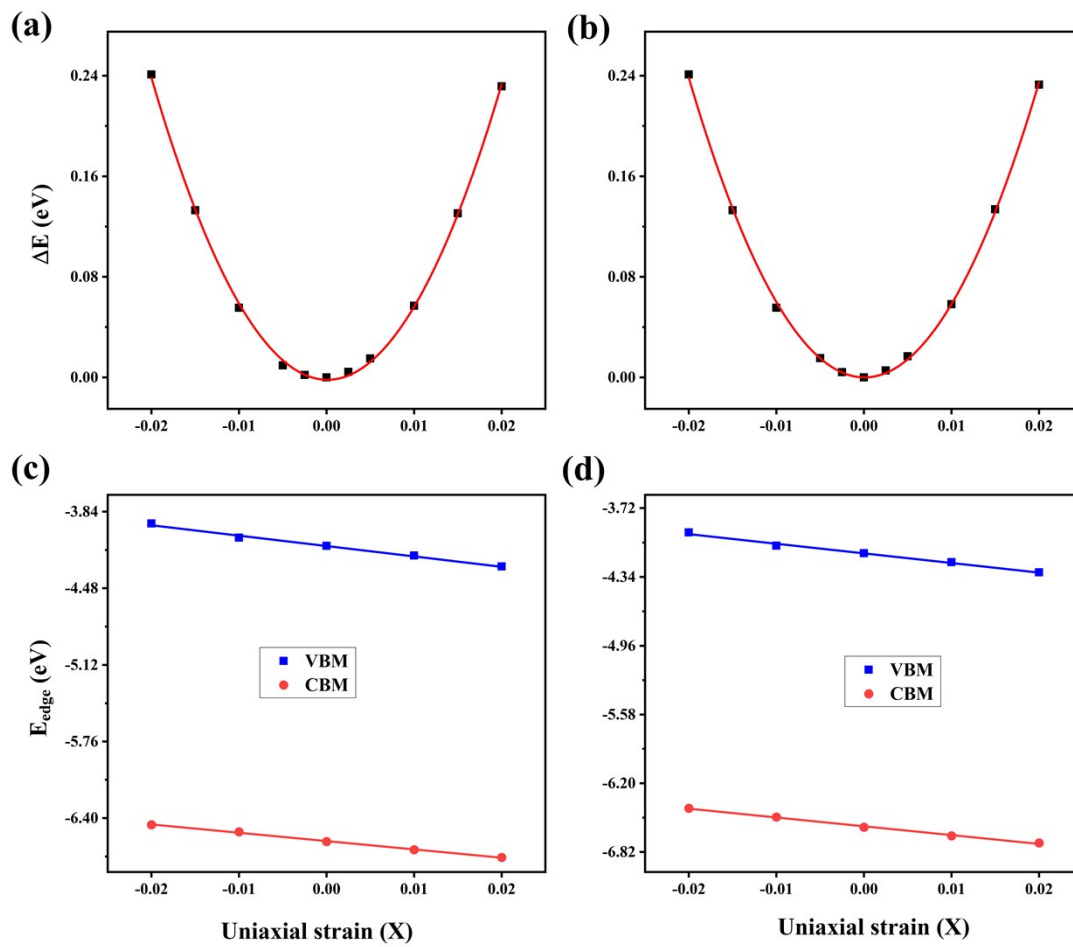

**Fig. S4** (a) and (b) Engineering energy difference of monolayer  $C_2N$  as function of the uniaxial strain. (c) and (d) Band edge positions of monolayer  $C_2N$  as function of uniaxial strain along x and y directions.

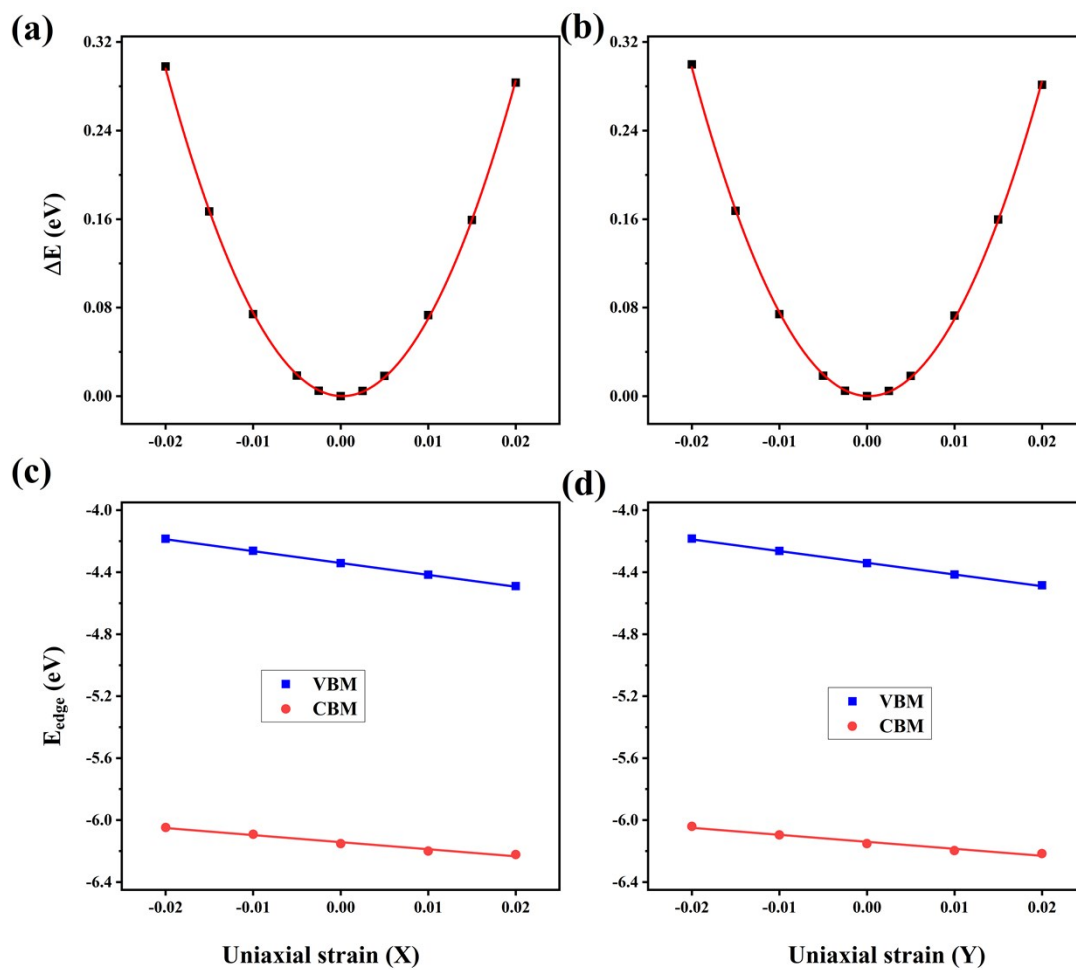

**Fig. S5** (a) and (b) Engineering energy difference of monolayer ZnSe as function of the uniaxial strain. (c) and (d) Band edge positions of monolayer ZnSe as function of uniaxial strain along x and y directions.

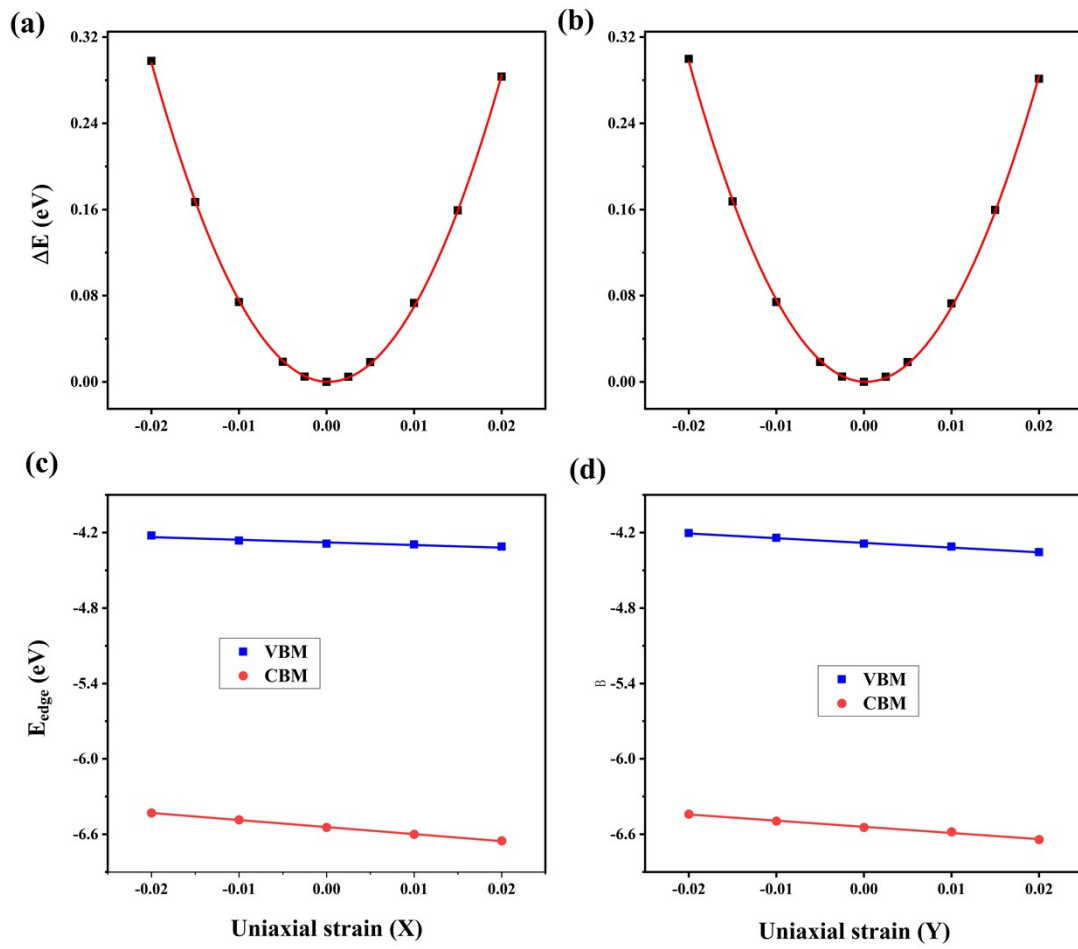

**Fig. S6** (a) and (b) Engineering energy difference of monolayer  $C_2N/ZnSe$  heterostructure as function of the uniaxial strain. (c) and (d) Band edge positions of monolayer  $C_2N/ZnSe$  heterostructure as function of uniaxial strain along x and y directions.
